# Supplementary material for: Providing evidence for the requirements to achieve supramolecular materials based on metal–nucleobase entities
Source: Royal Society of Chemistry journal article supplement (doi:10.1039/c8ce00141c), 2018-01-01
Supplement: c8ce00141c1.pdf [file c8ce00141c1.pdf]

## **Supplementary Information for:**

# Providing evidence on the requirements to achieve supramolecular materials based on metal-nucleobase entities

*Jintha Thomas-Gipson,<sup>a,b</sup> Garikoitz Beobide,<sup>b</sup> Oscar Castillo,<sup>\*,b</sup> Antonio Luque,<sup>b</sup> Jon Pascual-Colino,<sup>b</sup> Sonia Pérez-Yáñez,<sup>\*,b,c</sup> and Pascual Román<sup>b</sup>*

<sup>†</sup>Department of Applied Chemistry, Cochin University of Science and Technology, South Kalamassery, Kochi, Kerala, India.

<sup>‡</sup>Departamento de Química Inorgánica, Facultad de Ciencia y Tecnología, Universidad del País Vasco/Euskal Herriko Unibertsitatea, UPV/EHU, Apartado 644, E-48080 Bilbao, Spain.

<sup>§</sup>Departamento de Química Inorgánica, Facultad de Farmacia, Universidad del País Vasco/Euskal Herriko Unibertsitatea, UPV/EHU, E-01006 Vitoria-Gasteiz, Spain.

|                                                |    |
|------------------------------------------------|----|
| S1. Tables of most relevant coordination bonds | 1  |
| S2. Tables of non-covalent interactions        | 4  |
| S3. X-ray diffraction patterns                 | 9  |
| S4. Thermogravimetric data                     | 10 |

## S1. Tables of most relevant coordination bonds.

**Table S1.** Most relevant coordination bonds (Å) for compound **1**.<sup>[a]</sup>

| Compound 1             |          |
|------------------------|----------|
| Bonds                  |          |
| Cu1–N3                 | 2.025(4) |
| Cu1–N9 <sup>i</sup>    | 2.020(4) |
| Cu1–Cl1                | 2.402(2) |
| Cu1···Cu1 <sup>i</sup> | 3.035(2) |

[a]Symmetry codes: (i)  $-x, -y, z$ .

**Table S2.** Most relevant coordination bonds (Å) for compound **2**.

| Compound 2 |           |           |          |
|------------|-----------|-----------|----------|
| Bonds      |           |           |          |
| Co1–N3     | 2.115(2)  | Co2–N9    | 2.105(2) |
| Co1–O1w    | 2.122(2)  | Co2–Cl2   | 2.511(1) |
| Co1–O2w    | 2.154 (2) | Co2–Cl3   | 2.474(1) |
| Co1–Cl1    | 2.436(1)  | Co1···Co2 | 3.476(2) |
| Co1–Cl2    | 2.411(1)  |           |          |
| Co1–Cl3    | 2.482(1)  |           |          |

**Table S3.** Most relevant coordination bonds (Å) for compound **3**.<sup>[a]</sup>

| Compound 3 |          |                        |          |
|------------|----------|------------------------|----------|
| Bonds      |          |                        |          |
| Cu1–N29    | 1.987(4) | Cu1–Cl2A               | 2.242(3) |
| Cu1–N19    | 1.991(5) | Cu1–Cl1A               | 2.350(3) |
| Cu1–O1w    | 2.134(5) | Cu1–Cl2B <sup>i</sup>  | 2.260(4) |
|            |          | Cu1···Cu1 <sup>i</sup> | 3.658(4) |

[a]Symmetry codes: (i)  $-x+1, -y, -z+1$ .

**Table S4.** Most relevant coordination bonds (Å) for compound **4**.

| Compound <b>4</b> |          |
|-------------------|----------|
| Bonds             |          |
| Co1–O1w           | 2.091(1) |
| Co1–N7            | 2.149(2) |

**Table S5.** Most relevant coordination bonds (Å) for compound **5**.<sup>[a]</sup>

| Compound <b>5</b>    |          |                         |          |
|----------------------|----------|-------------------------|----------|
| Bonds                |          |                         |          |
| Cu1–O2 <sup>i</sup>  | 1.952(4) | Cu2–O6 <sup>ii</sup>    | 1.962(4) |
| Cu1–O1               | 1.955(4) | Cu2–O7                  | 1.982(4) |
| Cu1–O3               | 1.967(4) | Cu2–N11                 | 2.211(5) |
| Cu1–O4 <sup>i</sup>  | 1.977(4) | Cu1···Cu1 <sup>i</sup>  | 2.643(1) |
| Cu1–N17              | 2.211(5) | Cu1···Cu2               | 7.643(1) |
| Cu2–O5               | 1.957(4) | Cu2···Cu2 <sup>ii</sup> | 2.662(1) |
| Cu2–O8 <sup>ii</sup> | 1.959(4) |                         |          |

[a] Symmetry codes: (i)  $-x+1, -y, -z$ ; (ii)  $-x+1, -y+1, -z+1$ .

**Table S6.** Most relevant coordination bonds (Å) for compound **6**.<sup>[a]</sup>

| Compound <b>6</b> |          |                      |          |
|-------------------|----------|----------------------|----------|
| Bonds             |          |                      |          |
| Co1–O2w           | 2.086(1) | Co1–O2w <sup>i</sup> | 2.086(1) |
| Co1–O1w           | 2.122(1) | Co1–O1w <sup>i</sup> | 2.122(1) |
| Co1–N9            | 2.128(1) | Co1–N9 <sup>i</sup>  | 2.128(1) |

[a] Symmetry code: (i)  $-x+2, -y+1, -z+1$ .

## S2. Tables of non-covalent interactions.

**Table S7.** Structural parameters ( $\text{\AA}$ ,  $^\circ$ ) for non-covalent interactions in compound **2**.<sup>[a]</sup>

| D–H $\cdots$ A <sup>[b]</sup>       | H $\cdots$ A | D $\cdots$ A | D–H $\cdots$ A |
|-------------------------------------|--------------|--------------|----------------|
| N7–H7 $\cdots$ O3w                  | 1.92         | 2.731(3)     | 157.1          |
| N6–H6A $\cdots$ Cl3 <sup>i</sup>    | 2.70         | 3.435(2)     | 144.6          |
| N6–H6B $\cdots$ O3w                 | 2.23         | 3.054(3)     | 161.6          |
| O1w–H11 $\cdots$ N1 <sup>ii</sup>   | 1.93         | 2.785(3)     | 176.4          |
| O2w–H21 $\cdots$ Cl1 <sup>iii</sup> | 2.20         | 3.055(2)     | 168.8          |
| O1w–H12 $\cdots$ O2w <sup>iv</sup>  | 2.08         | 2.859(2)     | 153.6          |
| O3w–H31 $\cdots$ O1w <sup>v</sup>   | 2.30         | 3.071(2)     | 141.4          |
| O3w–H32 $\cdots$ Cl1 <sup>vi</sup>  | 2.24         | 3.1437(19)   | 163.5          |

[a] Symmetry code: (i)  $x, y-1, z$ ; (ii)  $-x+2, -y-1, -z+3$ ; (iii)  $-x+1, -y, -z+3$  (iv);  $-x+2, -y, -z+3$ ; (v)  $-x+3, -y-1, -z+2$ ; (vi)  $-x+2, -y-1, -z+2$ . [b] **D**: donor; **A**: acceptor.

**Table S8.** Structural parameters ( $\text{\AA}$ ,  $^\circ$ ) for non-covalent interactions in compound **3**.<sup>[a]</sup>

| D–H $\cdots$ A <sup>[b]</sup>       | H $\cdots$ A | D $\cdots$ A | D–H $\cdots$ A |
|-------------------------------------|--------------|--------------|----------------|
| O1w–H2w $\cdots$ Cl1B <sup>i</sup>  | 1.92         | 2.786(10)    | 153.9          |
| N13–H13 $\cdots$ O1w                | 1.86         | 2.576(6)     | 139.4          |
| N23–H23 $\cdots$ O1w                | 1.93         | 2.604(6)     | 133.9          |
| N13–H13 $\cdots$ Cl1B <sup>i</sup>  | 2.66         | 3.389(6)     | 143.8          |
| N23–H23 $\cdots$ Cl1B <sup>i</sup>  | 2.68         | 3.393(6)     | 141.8          |
| N11–H11 $\cdots$ O26 <sup>ii</sup>  | 1.90         | 2.723(6)     | 161.1          |
| N12–H12A $\cdots$ Cl1A <sup>i</sup> | 2.60         | 3.421(6)     | 161.1          |
| N12–H12A $\cdots$ Cl1B <sup>i</sup> | 2.37         | 3.182(6)     | 158.4          |
| N12–H12B $\cdots$ O26 <sup>ii</sup> | 2.42         | 3.105(6)     | 137.5          |
| N17–H17 $\cdots$ Cl4 <sup>iii</sup> | 2.27         | 3.118(5)     | 170.0          |
| N21–H21 $\cdots$ Cl3 <sup>iv</sup>  | 2.31         | 3.123(5)     | 156.8          |
| N22–H22A $\cdots$ Cl1A <sup>i</sup> | 2.62         | 3.429(7)     | 156.4          |
| N22–H22A $\cdots$ Cl1B <sup>i</sup> | 2.36         | 3.172(7)     | 156.7          |
| N22–H22B $\cdots$ Cl3 <sup>iv</sup> | 2.52         | 3.274(6)     | 147.5          |
| N27–H27 $\cdots$ O16 <sup>v</sup>   | 1.90         | 2.754(6)     | 174.7          |

[a] Symmetry code: (i)  $-x+1, -y+1, -z+1$ ; (ii)  $x, y, z+1$ ; (iii)  $x+1, y, z+1$ ; (iv)  $x, y+1, z$ ; (v)  $x, y, z-1$ . [b] **D**: donor; **A**: acceptor.

**Table S9.** Structural parameters ( $\text{\AA}$ ,  $^\circ$ ) for non-covalent interactions in compound **4**.<sup>[a]</sup>

| <i>Hydrogen bonding interactions.</i> <sup>[a]</sup>               |              |              |                |           |       |
|--------------------------------------------------------------------|--------------|--------------|----------------|-----------|-------|
| D–H $\cdots$ A <sup>[b]</sup>                                      | H $\cdots$ A | D $\cdots$ A | D–H $\cdots$ A |           |       |
| N6–H6A $\cdots$ N1 <sup>i</sup>                                    | 2.12         | 2.974(3)     | 175.6          |           |       |
| N6–H6B $\cdots$ O1w                                                | 2.31         | 2.980(2)     | 135.3          |           |       |
| N6–H6B $\cdots$ O1w <sup>II</sup>                                  | 2.31         | 2.980(2)     | 135.3          |           |       |
| O1w–H1A $\cdots$ Cl1 <sup>III</sup>                                | 2.13         | 3.073(1)     | 167.2          |           |       |
| O1w–H1B $\cdots$ O2w                                               | 1.93         | 2.771(2)     | 171.2          |           |       |
| O2w–H2A $\cdots$ N3 <sup>iv</sup>                                  | 2.06         | 2.920(2)     | 156.6          |           |       |
| O2w–H2B $\cdots$ Cl1                                               | 2.35         | 3.209(2)     | 171.4          |           |       |
| <i><math>\pi</math>-<math>\pi</math> interactions</i> <sup>c</sup> |              |              |                |           |       |
| Ring $\cdots$ Ring <sup>[d]</sup>                                  | Angle        | DC           | $\alpha$       | DZ        | DXY   |
| Ring(1) $\cdots$ Ring(1) <sup>v</sup>                              | 0            | 3.9521(8)    | 31.62          | 3.3654(1) | 2.072 |

[a] Symmetry: (i)  $-x+1, -y+1, -z+1$ ; (ii)  $x, -y+1, z$ ; (iii)  $-x+2, -y+1, -z+1$ ; (iv)  $-x+3/2, -y+3/2, -z+3/2$ ; (v)  $-x+3/2, y-1/2, -z+3/2$ . [b] **D**: donor; **A**: acceptor. [c] Angle: Dihedral Angle between Planes I and J ( $^\circ$ ), DC: Distance between ring centroids ( $\text{\AA}$ ),  $\alpha$ : Angle Cg(I) $\rightarrow$ Cg(J) vector and normal to plane I ( $^\circ$ ), DZ: Perpendicular distance of Cg(I) on ring J ( $\text{\AA}$ ), DXY: Slippage. [d] Ring 1: N1, C2, N3, C4, N9, C6.

**Table S10.** Structural parameters ( $\text{\AA}$ ,  $^\circ$ ) for non-covalent interactions in compound **5**.<sup>[a]</sup>

---

Hydrogen bonding interactions.<sup>[a]</sup>

---

| D–H $\cdots$ A <sup>[b]</sup>  | H $\cdots$ A | D $\cdots$ A | D–H $\cdots$ A |
|--------------------------------|--------------|--------------|----------------|
| N16–H16A $\cdots$ O7           | 1.96         | 2.793(6)     | 162.3          |
| N16–H16B $\cdots$ O3           | 1.94         | 2.801(6)     | 178.1          |
| O9–H9 $\cdots$ O5 <sup>i</sup> | 2.04         | 2.835(6)     | 161.8          |

---

[a] Symmetry code: (i)  $-x+1, -y+1, -z+1$ . [b] **D**: donor; **A**: acceptor.

**Table S11.** Structural parameters ( $\text{\AA}$ ,  $^\circ$ ) for non-covalent interactions in compound **6**.<sup>[a]</sup>

| Hydrogen bonding interactions. <sup>[a]</sup>       |              |              |                |           |        |
|-----------------------------------------------------|--------------|--------------|----------------|-----------|--------|
| D–H $\cdots$ A <sup>[b]</sup>                       | H $\cdots$ A | D $\cdots$ A | D–H $\cdots$ A |           |        |
| O1w–H11 $\cdots$ N7 <sup>i</sup>                    | 2.24         | 3.020(2)     | 149.8          |           |        |
| O1w–H12 $\cdots$ N7 <sup>ii</sup>                   | 2.11         | 2.902(2)     | 151.1          |           |        |
| O2w–H21 $\cdots$ N3 <sup>iii</sup>                  | 1.94         | 2.737(2)     | 153.4          |           |        |
| O2w–H22 $\cdots$ O4w <sup>iv</sup>                  | 1.81         | 2.709(2)     | 169.4          |           |        |
| O3w–H31 $\cdots$ O1w                                | 2.19         | 2.979(2)     | 153.7          |           |        |
| O4w–H41 $\cdots$ N1                                 | 1.90         | 2.827(2)     | 164.0          |           |        |
| O4w–H42 $\cdots$ O3w <sup>v</sup>                   | 1.82         | 2.673(2)     | 175.5          |           |        |
| $\pi$ – $\pi$ stacking interactions. <sup>[c]</sup> |              |              |                |           |        |
| Ring $\cdots$ Ring <sup>[d]</sup>                   | Angle        | DC           | $\alpha$       | DZ        | DXY    |
| Ring1–Ring1 <sup>vi</sup>                           | 2            | 3.6908(9)    | 19.22          | 3.4987(6) | 1.1752 |
| Ring1–Ring1 <sup>vii</sup>                          | 2            | 3.6908(9)    | 18.56          | 3.4851(6) | 1.2149 |
| Ring1–Ring2 <sup>vi</sup>                           | 1.79(8)      | 3.6505(8)    | 18.26          | 3.4958(6) | 1.1434 |
| Ring2–Ring1 <sup>vii</sup>                          | 1.79(8)      | 3.6506(8)    | 16.74          | 3.4668(6) | 1.1438 |
| Ring2–Ring2 <sup>vi</sup>                           | 1            | 3.7471(8)    | 22.24          | 3.4857(6) | 1.3750 |
| Ring2–Ring2 <sup>vii</sup>                          | 1            | 3.7472(8)    | 21.53          | 3.4684(6) | 1.4183 |

[a] Symmetry: (i)  $-x+2, y-1/2, -z+3/2$ ; (ii)  $x, -y+3/2, z+1/2$ ; (iii)  $-x+2, -y+1, -z+1$ ; (iv)  $x+1, -y+3/2, z+1/2$ ; (v)  $-x+1, y+1/2, -z+3/2$ ; (vi)  $x, 3/2-y, -1/2+z$ ; (vii)  $x, 3/2-y, 1/2+z$ ; [b] **D**: donor; **A**: acceptor. [c] Angle: Dihedral Angle between Planes I and J ( $^\circ$ ), DC: Distance between ring centroids ( $\text{\AA}$ ),  $\alpha$ : Angle Cg(I) $\rightarrow$ Cg(J) vector and normal to plane I ( $^\circ$ ), DZ: Perpendicular distance of Cg(I) on ring J ( $\text{\AA}$ ), DXY: Slippage. [d] Ring 1: N7, C5, C4, N9, C8; Ring 2: N1, C2, N3, C4, C5, C6.



### S3. X-ray diffraction patterns

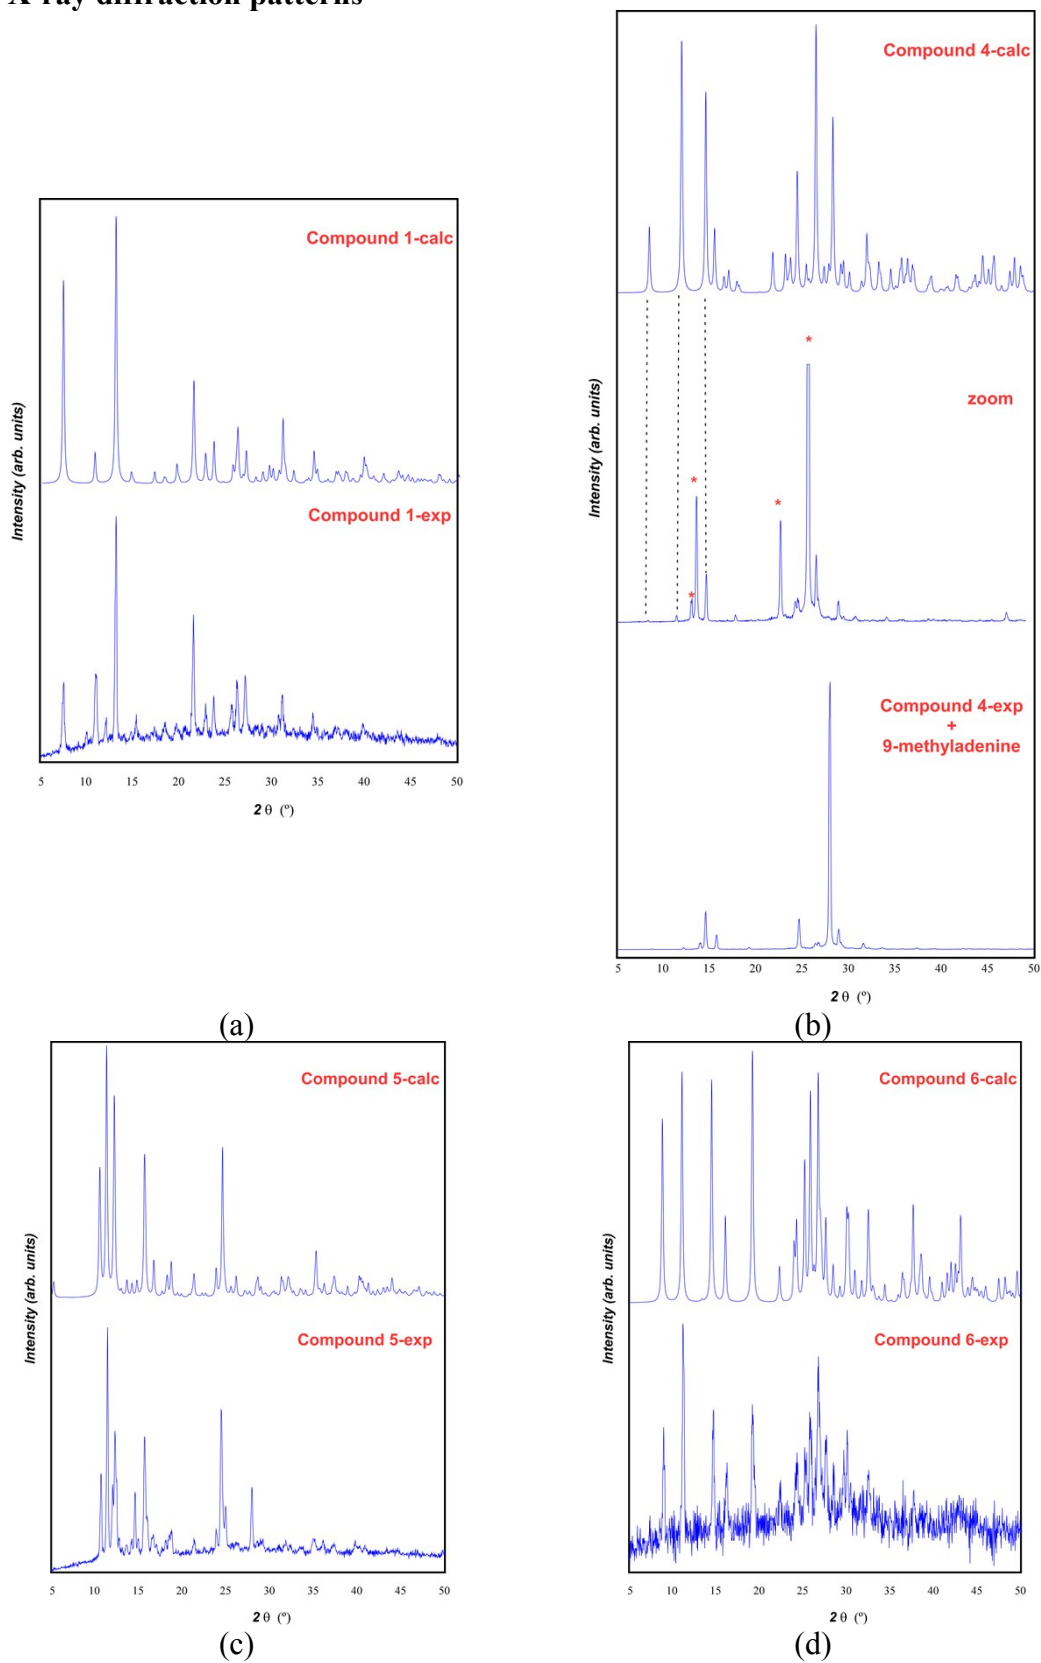

**Figure S1.** Experimental and calculated X-ray diffraction patterns of: (a) compound **1**, (b) compound **4**, (c) compound **5** and (d) compound **6**. Note that compound **4** appears cocrystallized with 9-methyladenine, so a zoom has been included in order to show more clearly the peaks corresponding to compound **4**. \* corresponds to the peaks assigned to 9-methyladenine, and some discontinuous lines have been included which correspond to compound **4**.

#### S4. Thermogravimetric data

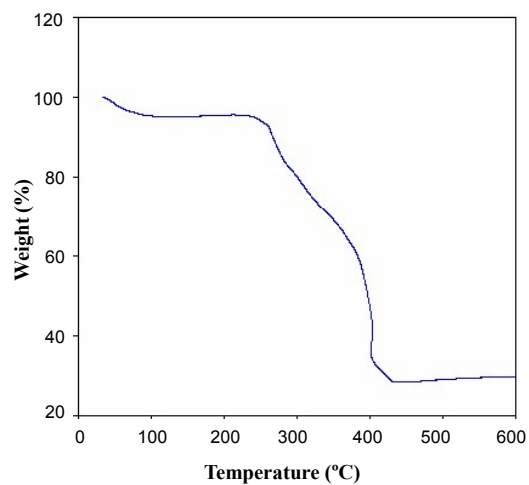

(a)

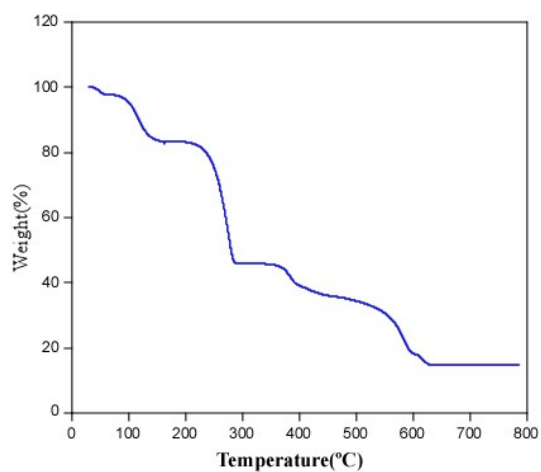

(b)

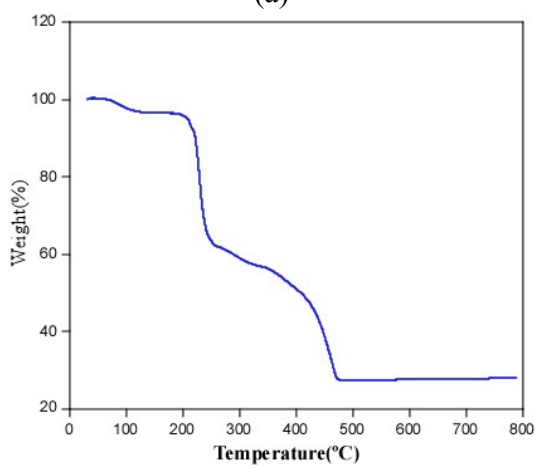

(c)

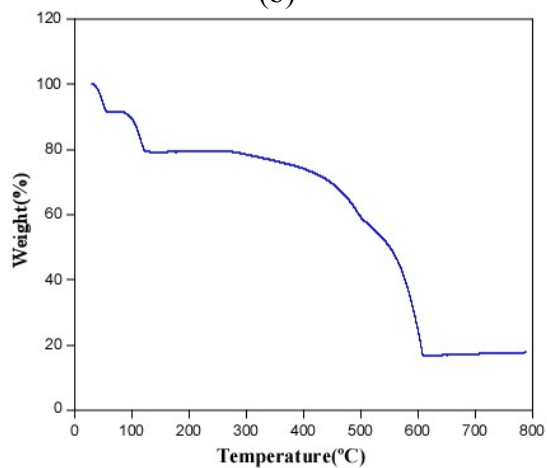

(d)

Figure S2. Thermogravimetric data of: (a) compound 1, (b) compound 4, (c) compound 5 and (d) compound 6.
